# Supplementary material for: High-performance LiMnPO4/C nanoplates synthesized by negative pressure immersion and a solid state reaction using nanoporous Mn2O3 precursors
Source: Royal Society of Chemistry journal article supplement (doi:10.1039/c5ta02431e), 2015-01-01
Supplement: c5ta02431e1.pdf [file c5ta02431e1.pdf]

## High-performance LiMnPO<sub>4</sub>/C nanoplates synthesized by negative pressure immersion and solid state reaction using nanoporous Mn<sub>2</sub>O<sub>3</sub> precursor

Jugong Zheng,<sup>ab</sup> Cancan Qin,<sup>a</sup> Tongfu Wu,<sup>a</sup> Shuangfei Xie,<sup>a</sup> Liang Ni,<sup>a</sup> Muyang Peng,<sup>a</sup> Yuefeng Tang<sup>\*a</sup> and Yanfeng Chen<sup>a</sup>

*a, National Laboratory of Solid State Microstructures, College of Engineering and Applied Sciences, Nanjing University, Nanjing 210093, China.*

*b, Department of Materials Science and Engineering, East China Institute of Technology, Nanchang 330013, China.*

### SI 1. Preparation of the suspensions

According to the stoichiometric molar ratio of Li : Mn = 1.03, and Li : C = 1 : 1.1, lithium dihydrogen phosphate (LiH<sub>2</sub>PO<sub>4</sub>, 99%, Aladdin Chemistry Co., Ltd., USA), lithium hydroxide (LiOH, 98%, Aladdin Industrial Co., China) and sucrose (C<sub>12</sub>H<sub>22</sub>O<sub>11</sub>, AR, Sinopharm Chemical Reagent Co., Ltd.) were dissolved in deionized water. The aqueous solution was then transferred into an injector. L-Mn<sub>2</sub>O<sub>3</sub> and S-Mn<sub>2</sub>O<sub>3</sub> powders were weighed and put into two corundum crucibles. The crucibles were sealed in a three mouth bottle connected with vacuum pump and injector. The sealed devices were pumped to an initial pressure of 1104 Pa. Then the aqueous solution was injected into the crucibles to obtain black suspensions.

---

\*: Corresponding Author at: National Laboratory of Solid State Microstructures, College of Engineering and Applied Sciences, Nanjing University, Nanjing, Jiangsu 210093, China, Tel.: (86)-25-83594317, Fax: (86)-25-83594668  
E-mail: [yftang@nju.edu.cn](mailto:yftang@nju.edu.cn),

SI Figure

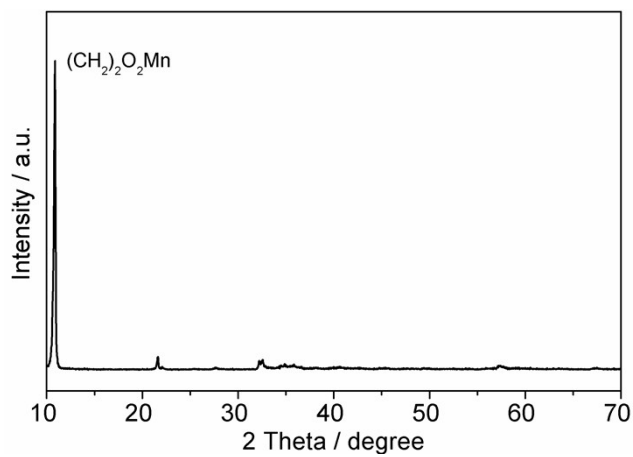

SI Fig. 1 XRD pattern of glycolic manganese ( $(\text{CH}_2)_2\text{O}_2\text{Mn}$ )

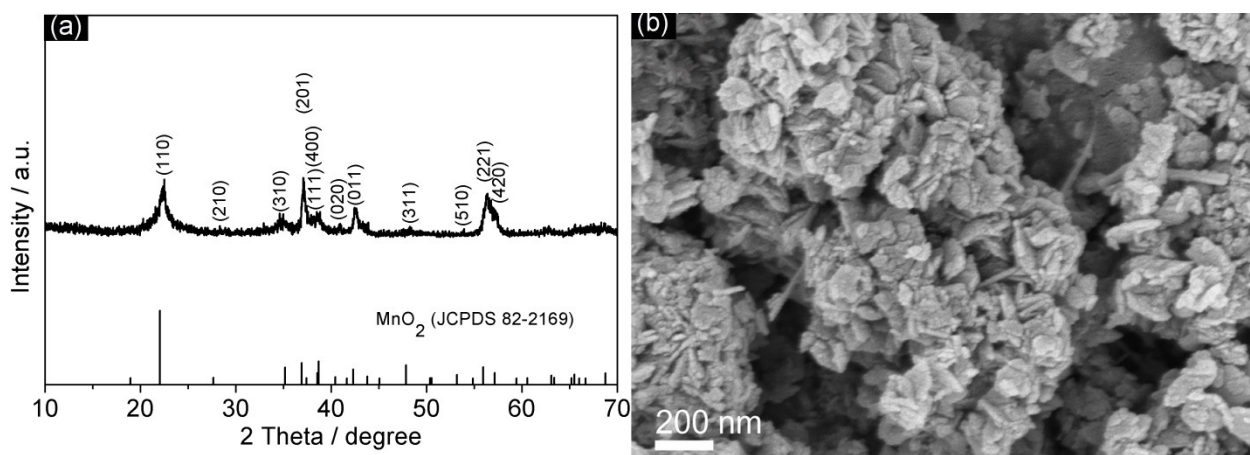

SI Fig. 2 XRD pattern and SEM image of raw material  $\text{MnO}_2$ , (a) XRD patterns, (b) SEM image.
